# Supplementary material for: Systemic immune changes accompany combination treatment with immunotoxin LMB‐100 and nab‐paclitaxel
Source: PubMed Central journal article supplement (PMC9972172; doi:10.1002/cam4.5290), 2022-10-08

## Supplemental Figure 2. Best CA19-9 Response

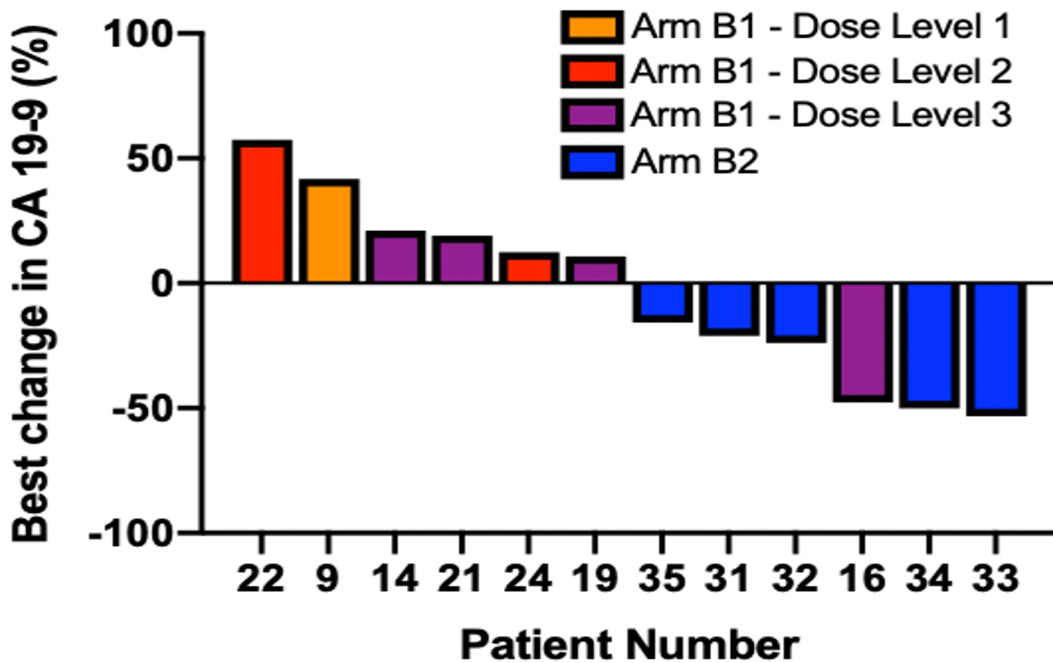

Supplement: CAM4-12-4236-s003.pdf [file CAM4-12-4236-s003.pdf]
